# Supplementary material for: Divergent projections of the prelimbic cortex bidirectionally regulate active avoidance
Source: eLife. 2020 Oct 15;9:e59281. doi: 10.7554/eLife.59281 (PMC7588229; doi:10.7554/eLife.59281)
Supplement: Figure 1—source data 1. [file elife-59281-fig1-data1.xlsx]

## Sheet: Panel C
Panel C	Tx	Cond	4hz test	15hz test
	ChR2	87	44	57.6667
	ChR2	91.3333	35	0
	ChR2	87	0	0
	ChR2	86	71.3333	0
	ChR2	86.6667	90.6667	0
	ChR2	19.6667	29.3333	60.3333
	ChR2	80.6667	56	61.6667
	ChR2	90	81.6667	0
	eYFP	83	36.6667	86
	eYFP	65	90.3333	86.3333
	eYFP	82.6667	92	86
	eYFP	83.6667	51.3333	91.3333
	eYFP	57.3333	75.3333	82
	eYFP	73.6667	69.3333	89
	eYFP	82	91.3333	93.6667
	eYFP	90.3333	87.6667	95.6667
	eYFP	88	55	72
	eYFP	97	93	93.6667
	eYFP	88	90.6667	88
	eYFP	89.3333	95	87.6667

## Sheet: Panel D
Panel D	Tx	0-3s	3-6s	6-9s	9-12s	12-15s	15-18s	18-21s	21-24s	24-27s	27-30s
	ChR2	13.3333	100	100	100	100	100	100	100	100	100
	ChR2	0	16.6667	93.3333	23.3333	100	100	53.3333	100	76.6667	0
	ChR2	0	0	23.3333	20	6.66667	0	43.3333	96.6667	70	33.3333
	ChR2	0	0	0	0	0	56.6667	100	100	100	100
	ChR2	0	0	0	0	0	0	83.3333	100	100	100
	ChR2	0	0	0	0	0	0	0	0	0	0
	ChR2	0	0	20	100	100	100	100	100	100	100
	ChR2	0	40	100	100	100	100	100	100	100	100
	eYFP	53.3333	100	100	100	100	100	100	100	100	90
	eYFP	0	0	83.3333	100	90	86.6667	100	100	100	100
	eYFP	0	0	0	0	26.6667	100	100	33.3333	43.3333	100
	eYFP	43.3333	100	100	100	100	100	100	100	100	100
	eYFP	0	0	0	0	26.6667	100	100	100	100	100
	eYFP	0	0	33.3333	100	100	76.6667	100	100	96.6667	100
	eYFP	40	100	100	100	100	100	100	100	100	100
	eYFP	0	96.6667	100	100	100	100	100	100	100	100
	eYFP	0	96.6667	100	100	100	96.6667	56.6667	0	0	0
	eYFP	36.6667	100	100	100	100	100	100	100	100	100
	eYFP	43.3333	100	100	100	100	100	100	100	100	100
	eYFP	63.3333	100	100	100	100	100	100	100	100	100

## Sheet: Panel E
Panel E	Tx	0-3s	3-6s	6-9s	9-12s	12-15s	15-18s	18-21s	21-24s	24-27s	27-30s
	ChR2	0	0	0	0	0	0	0	0	0	0
	ChR2	0	6.66667	100	100	100	100	93.3333	3.33333	30	100
	ChR2	0	70	100	50	86.6667	100	13.3333	66.6667	50	96.6667
	ChR2	0	0	0	0	100	100	100	100	100	100
	ChR2	0	0	0	0	0	0	0	0	0	0
	ChR2	0	0	0	0	0	0	0	0	0	0
	ChR2	0	0	0	0	0	0	0	0	0	0
	ChR2	0	0	0	0	0	0	0	0	0	0
	eYFP	0	80	100	100	100	100	100	100	100	100
	eYFP	0	46.6667	100	100	100	100	100	100	100	100
	eYFP	0	83.3333	100	100	100	100	100	100	100	100
	eYFP	0	90	100	100	100	100	100	100	100	100
	eYFP	23.3333	100	100	100	100	100	100	100	100	100
	eYFP	16.6667	100	100	100	100	100	100	100	100	100
	eYFP	43.3333	100	100	100	100	100	100	100	100	100
	eYFP	70	100	100	100	100	100	100	100	100	100
	eYFP	0	0	26.6667	100	100	100	100	100	100	100
	eYFP	70	100	100	100	100	100	100	100	100	100
	eYFP	0	96.6667	100	100	100	100	100	100	100	100
	eYFP	0	90	100	100	100	100	100	100	100	100

## Sheet: Panel G
Panel G	Tx	Cond	Test
	ArchT	92.6667	48
	ArchT	81	52
	ArchT	100	63.3333
	ArchT	96.3333	87.3333
	ArchT	90.3333	43
	ArchT	85.3333	83
	ArchT	76.6667	93.3333
	ArchT	93	82.3333
	eYFP	93	72
	eYFP	92	72
	eYFP	54	84
	eYFP	86	79.6667
	eYFP	93.3333	82.6667
	eYFP	94.6667	86
	eYFP	100	74.6667
	eYFP	100	88.6667
	eYFP	91.6667	87
	eYFP	78.6667	36.3333
	eYFP	95.6667	76
	eYFP	81.3333	42
	eYFP	94.3333	92.6667
	eYFP	89.6667	87.3333

## Sheet: Panel H
Panel H	Tx	0-3s	3-6s	6-9s	9-12s	12-15s	15-18s	18-21s	21-24s	24-27s	27-30s
	ArchT	0	0	16.6667	100	76.6667	100	66.6667	13.3333	46.6667	60
	ArchT	0	0	0	10	33.3333	76.6667	100	100	100	100
	ArchT	0	0	0	33.3333	100	100	100	100	100	100
	ArchT	0	0	0	0	0	30	100	100	100	100
	ArchT	0	73.3333	100	100	100	100	100	100	100	100
	ArchT	0	56.6667	100	100	100	100	100	100	100	100
	ArchT	33.3333	100	100	100	100	100	100	100	100	100
	ArchT	0	76.6667	100	100	100	100	100	100	100	100
	eYFP	0	0	20	100	100	100	100	100	100	100
	eYFP	0	0	20	100	100	100	100	100	100	100
	eYFP	0	40	100	100	100	100	100	100	100	100
	eYFP	0	36.6667	100	100	100	100	100	100	100	60
	eYFP	0	30	100	100	100	100	100	100	100	100
	eYFP	0	60	100	100	100	100	100	100	100	100
	eYFP	0	0	46.6667	100	100	100	100	100	100	100
	eYFP	26.6667	100	100	100	100	100	100	100	100	100
	eYFP	3.33333	86.6667	100	100	100	100	100	100	100	100
	eYFP	0	0	0	0	0	0	93.3333	100	100	100
	eYFP	0	0	66.6667	100	100	100	100	100	100	100
	eYFP	0	0	0	20	23.3333	60	100	90	100	56.6667
	eYFP	26.6667	100	100	100	100	100	100	100	100	100
	eYFP	0	73.3333	100	100	100	100	100	100	100	100
