# Supplementary material for: Divergent projections of the prelimbic cortex bidirectionally regulate active avoidance
Source: eLife. 2020 Oct 15;9:e59281. doi: 10.7554/eLife.59281 (PMC7588229; doi:10.7554/eLife.59281)
Supplement: Figure 2—source data 1. [file elife-59281-fig2-data1.xlsx]

## Sheet: Panel B
Panel B	Tx	Cond		Tx	4hz test		Tx	15hz test
	ChR2	96.6667		ChR2	96		ChR2	95.6667
	ChR2	94.3333		ChR2	90.6667		ChR2	90
	ChR2	96		ChR2	91		ChR2	90.3333
	ChR2	72		ChR2	90.6667		ChR2	83.3333
	ChR2	59		ChR2	83.3333		ChR2	82
	ChR2	86.6667		eYFP	67.6667		ChR2	87
	ChR2	96.6667		eYFP	95.6667		ChR2	88.6667
	ChR2	97		eYFP	96.3333		ChR2	87
	ChR2	92		eYFP	75		ChR2	86
	ChR2	72.6667		eYFP	66.6667		eYFP	89
	eYFP	98		eYFP	85		eYFP	94
	eYFP	97.3333		eYFP	63		eYFP	61.6667
	eYFP	94.3333		eYFP	89.6667		eYFP	75
	eYFP	79.6667					eYFP	83.6667
	eYFP	42.3333					eYFP	71.3333
	eYFP	88					eYFP	52.6667
	eYFP	82.3333					eYFP	71
	eYFP	98
	eYFP	98
	eYFP	97.3333
	eYFP	10
	eYFP	100
	eYFP	90.6667
	eYFP	81.6667
	eYFP	97
	eYFP	55

## Sheet: Panel C
Panel C	Tx	0-3s	3-6s	6-9s	9-12s	12-15s	15-18s	18-21s	21-24s	24-27s	27-30s
	ChR2	73.3333	100	100	100	100	100	100	100	100	100
	ChR2	26.6667	100	100	100	100	100	100	100	100	100
	ChR2	30	100	100	100	100	100	100	100	100	100
	ChR2	20	100	100	100	100	100	100	100	100	100
	ChR2	0	56.6667	100	100	100	100	100	100	100	100
	eYFP	0	0	3.33333	100	100	100	100	100	100	100
	eYFP	73.3333	100	100	100	100	100	100	100	100	100
	eYFP	83.3333	100	100	100	100	100	100	100	100	100
	eYFP	0	0	63.3333	100	100	100	100	100	100	100
	eYFP	0	0	0	80	100	100	100	100	100	100
	eYFP	0	73.3333	100	100	100	100	100	100	100	100
	eYFP	0	0	80	100	100	100	26.6667	56.6667	100	100
	eYFP	0	96.6667	100	100	100	100	100	100	100	100

## Sheet: Panel D
Panel D	Tx	0-3s	3-6s	6-9s	9-12s	12-15s	15-18s	18-21s	21-24s	24-27s	27-30s
	ChR2	73.3333	100	100	100	100	100	100	100	100	100
	ChR2	26.6667	100	100	100	100	100	100	100	100	100
	ChR2	30	100	100	100	100	100	100	100	100	100
	ChR2	20	100	100	100	100	100	100	100	100	100
	ChR2	0	83.3333	100	100	100	100	100	100	100	100
	ChR2	0	83.3333	100	100	100	100	100	100	100	100
	ChR2	10	100	100	100	100	100	100	100	100	100
	ChR2	0	60	100	100	100	100	100	100	100	100
	ChR2	0	33.3333	100	100	100	100	100	100	100	100
	eYFP	0	0	3.33333	100	100	100	100	100	100	100
	eYFP	73.3333	100	100	100	100	100	100	100	100	100
	eYFP	0	0	73.3333	100	100	100	100	100	100	100
	eYFP	0	0	0	10	100	100	100	96.6667	30	100
	eYFP	0	0	26.6667	100	100	100	100	100	100	100
	eYFP	0	26.6667	100	100	100	100	96.6667	63.3333	100	73.3333
	eYFP	0	76.6667	100	100	100	100	100	100	100	100
	eYFP	0	0	13.3333	100	100	100	100	100	100	100

## Sheet: Panel E
Panel E	Tx	Ext-B1	Ext-B2	Ext-B3	Ext-B4	Ext-B5	Ext-B6	Ext-B7	15hz test
	ChR2	71.5	28.1667	26.6667	36.1667	27.3333	24.6667	0	21
	ChR2	22.3333	74.6667	57.3333	34.6667	6.83333	28.5	0	26
	ChR2	82.1667	81.5	67.5	30.6667	3.5	0	11.1667	28.3333
	ChR2	91	100	83.8333	38.8333	36.6667	51.6667	0	62.6667
	eYFP	73.1667	14.6667	0	2.16667	0	2.16667	4.16667	9.66667
	eYFP	89	84.6667	60.1667	58.5	40	30.3333	0	0
	eYFP	46.5	74.5	53.3333	45.1667	24.6667	4.5	9	0
	eYFP	35	16.1667	0	0	0	0	0	0

## Sheet: Panel G
Panel G	Tx	Cond	Test
	ArchT	99.6667	0
	ArchT	96	65.3333
	ArchT	89	80.3333
	ArchT	78	71.3333
	ArchT	88	0
	ArchT	9.66667	0
	ArchT	83.3333	48
	ArchT	92.3333	77.6667
	ArchT	97	0
	eYFP	52.6667	46
	eYFP	95	93
	eYFP	95.6667	62
	eYFP	94.3333	90.3333
	eYFP	90.6667	92
	eYFP	78	45
	eYFP	93	93.3333
	eYFP	68	90
	eYFP	95	83
	eYFP	86.6667	57.6667
	eYFP	93.6667	94

## Sheet: Panel H
Panel H	Tx	0-3s	3-6s	6-9s	9-12s	12-15s	15-18s	18-21s	21-24s	24-27s	27-30s
	ArchT	0	0	0	0	0	0	0	0	0	0
	ArchT	0	0	0	76.6667	100	100	100	100	100	100
	ArchT	0	56.6667	73.3333	93.3333	100	100	100	100	100	100
	ArchT	0	0	13.3333	100	100	100	100	100	100	100
	ArchT	0	0	0	0	0	0	0	0	0	0
	ArchT	0	0	0	0	0	0	0	0	0	0
	ArchT	0	93.3333	73.3333	3.33333	23.3333	100	100	83.3333	0	0
	ArchT	0	0	93.3333	100	100	100	100	100	100	100
	ArchT	0	0	0	0	0	0	0	0	0	0
	Eyfp	0	0	0	20	100	100	100	100	60	60
	eYFP	60	100	100	100	100	100	100	100	100	93.3333
	eYFP	0	0	10	23.3333	100	100	100	100	100	100
	eYFP	26.6667	100	100	100	100	100	100	100	100	100
	eYFP	6.66667	100	100	100	100	100	100	100	100	100
	eYFP	63.3333	100	100	100	100	100	100	100	100	100
	eYFP	60	100	100	100	100	100	100	100	100	100
	eYFP	0	43.3333	100	100	100	100	100	100	100	100
	eYFP	0	0	56.6667	100	100	100	100	100	20	0
	eYFP	70	100	100	100	100	100	100	100	100	100
	eYFP	0	0	0	0	86.6667	100	100	100	63.3333	0
