# Supplementary material for: Divergent projections of the prelimbic cortex bidirectionally regulate active avoidance
Source: eLife. 2020 Oct 15;9:e59281. doi: 10.7554/eLife.59281 (PMC7588229; doi:10.7554/eLife.59281)
Supplement: Figure 3—source data 1. [file elife-59281-fig3-data1.xlsx]

## Sheet: Panel B
Panel B	Tx	Cond	4hz test	15hz test
	ChR2	89.6667	94.3333	89.6667
	ChR2	96.6667	96.6667	94.6667
	ChR2	53.3333	81.3333	89
	ChR2	79.6667	91.6667	74.6667
	ChR2	94.6667	83.6667	89
	ChR2	86	84.3333	73
	ChR2	95.3333	96	94.3333
	eYFP	100	88.6667	78.3333
	eYFP	93.3333	89.6667	88
	eYFP	74.3333	80.3333	44.6667
	eYFP	91.6667	93.6667	88.3333
	eYFP	84.3333	18.6667	17.3333
	eYFP	89.6667	33.3333	92
	eYFP	92.6667	85	79

## Sheet: Panel C
Panel C	Tx	0-3s	3-6s	6-9s	9-12s	12-15s	15-18s	18-21s	21-24s	24-27s	27-30s
	ChR2	70	100	100	100	100	100	100	100	100	100
	ChR2	73.3333	100	100	100	100	100	100	100	100	100
	ChR2	0	46.6667	100	100	100	100	100	100	100	100
	ChR2	33.3333	100	100	100	100	100	100	100	100	100
	ChR2	0	63.3333	100	100	100	100	100	100	100	100
	ChR2	0	86.6667	63.3333	100	100	100	100	100	100	100
	ChR2	80	100	100	100	100	100	100	100	100	100
	eYFP	0	93.3333	100	100	100	100	100	100	100	100
	eYFP	26.6667	100	100	100	100	100	100	100	100	100
	eYFP	0	0	0	0	0	0	43.3333	100	100	100
	eYFP	0	13.3333	100	100	100	100	100	100	100	100
	eYFP	46.6667	100	100	100	100	100	100	100	100	100
	eYFP	0	80	60	36.6667	6.66667	0	3.33333	0	0	0
	eYFP	0	63.3333	100	100	100	100	100	100	100	100

## Sheet: Panel D
Panel D	Tx	0-3s	3-6s	6-9s	9-12s	12-15s	15-18s	18-21s	21-24s	24-27s	27-30s
	ChR2	6.66667	100	100	100	100	100	100	100	100	100
	ChR2	50	100	100	100	100	100	100	100	100	100
	ChR2	26.6667	20	100	100	3.33333	93.3333	100	100	63.3333	50
	ChR2	0	63.3333	63.3333	60	76.6667	100	100	100	100	100
	ChR2	20	100	100	100	100	100	100	100	100	100
	ChR2	0	0	63.3333	100	100	100	100	100	100	100
	ChR2	70	100	100	100	100	100	100	100	100	100
	eYFP	0	16.6667	100	100	100	100	100	100	100	100
	eYFP	10	100	100	100	100	100	100	100	100	100
	eYFP	53.3333	100	100	100	100	100	100	100	100	100
	eYFP	0	0	0	0	0	63.3333	100	100	100	100
	eYFP	0	93.3333	100	100	100	100	100	100	100	100
	eYFP	0	30	10	16.6667	36.6667	0	0	0	13.3333	70
	eYFP	0	16.6667	100	96.6667	100	100	100	100	100	100

## Sheet: Panel E
Panel E	Tx	Ext-B1	Ext-B2	Ext-B3	Ext-B4	Ext-B5	Ext-B6	Ext-B7	15hz test
	ChR2	59.8333	23.5	0	22	16.5	7.16667	8.83333	34
	ChR2	78.5	58	45.5	49.6667	33.8333	61.8333	16	57
	ChR2	73.5	42.6667	2.16667	2	24.8333	20.3333	0	22
	ChR2	77	77.3333	13.5	48.6667	44.1667	34.3333	73	59.3333
	ChR2	97.3333	56.5	16	14	0	0	0	11.6667
	ChR2	66.8333	64	24.5	33.5	10.8333	15	9.33333	38.3333
	ChR2	93.5	83.6667	54.3333	25	10.3333	35.8333	16.6667	41
	eYFP	91.1667	49	21.6667	16.6667	16.8333	15	12.6667	20.3333
	eYFP	47	14.8333	0	3	0	2.5	0	0
	eYFP	91.3333	35.6667	37.6667	70.3333	2.16667	21.8333	70.3333	0
	eYFP	79.1667	51.8333	2.83333	6.5	0	4.16667	16	0
	eYFP	34.5	7.83333	1	0	0	0	0	12
	eYFP	67.3333	53.3333	55	38.8333	15.0151	15.6648	2.33333	20

## Sheet: Panel G
Panel G	Tx	Cond	Test
	ArchT	100	0
	ArchT	83	9.33333
	ArchT	92.3333	0
	ArchT	94.3333	44.3333
	ArchT	93.6667	94.3333
	ArchT	61.6667	47.6667
	ArchT	85	0
	eYFP	84.6667	70.3333
	eYFP	87.3333	91.6667
	eYFP	73.3333	79.3333
	eYFP	83	6.33333
	eYFP	92.3333	82.6667
	eYFP	90	71
	eYFP	94.6667	90
	eYFP	89.3333	92.3333
	eYFP	78.3333	56.6667
	eYFP	75.3333	82.6667
	eYFP	81.6667	86.3333
	eYFP	100	95.3333
	eYFP	89	89
	eYFP	95.3333	92

## Sheet: Panel H
Panel H	Tx	0-3s	3-6s	6-9s	9-12s	12-15s	15-18s	18-21s	21-24s	24-27s	27-30s
	ARCH	0	0	0	0	0	0	0	0	0	0
	ARCH	0	0	0	0	0	0	0	0	30	80
	ARCH	0	0	0	0	0	0	0	0	0	0
	ARCH	0	0	0	0	0	70	100	100	100	100
	ARCH	56.6667	100	100	100	100	100	100	100	100	100
	ARCH	0	0	0	0	0	93.3333	100	100	100	100
	ARCH	0	0	0	0	0	0	0	0	0	0
	EYFP	0	0	0	0	0	0	0	0	0	73.3333
	EYFP	0	0	36.6667	100	100	100	100	100	100	100
	EYFP	40	100	100	100	100	100	100	100	100	100
	EYFP	0	23.3333	100	100	100	100	100	100	100	100
	EYFP	0	30	100	100	100	100	100	100	100	100
	EYFP	23.3333	100	100	100	100	100	100	100	100	100
	EYFP	0	86.6667	100	100	100	100	100	40	83.3333	0
	EYFP	56.6667	100	100	100	100	100	100	100	100	100
	EYFP	0	0	0	0	100	100	100	100	100	100
	EYFP	66.6667	56.6667	100	93.3333	53.3333	100	100	100	93.3333	90
	EYFP	0	96.6667	100	100	100	100	100	100	100	100
	EYFP	60	100	100	100	100	100	100	100	100	100
	EYFP	1.7	3	3	3	3	3	3	3	3	3
	EYFP	1.4	3	3	3	3	3	3	3	3	3
